# Supplementary material
Source: PubMed Central journal article supplement (PMC2117633)
Supplement: jnnpsyc_jnnp.2006.093849_2.pdf [file jnnpsyc_jnnp.2006.093849_2.pdf]

**Table 4**

Anatomical location of areas of reduced grey matter in PDD compared with control subjects, unmodulated images.

| <i>Voxel level</i>  |   |                            |          |          |          |                |
|---------------------|---|----------------------------|----------|----------|----------|----------------|
| <b>Cluster size</b> |   | <b>Anatomical location</b> | <b>x</b> | <b>y</b> | <b>z</b> | <b>T score</b> |
| 553                 | L | Middle temporal gyrus*     | -44      | -63      | 3        | 4.65           |
| 170                 | R | Middle occipital gyrus     | 48       | -55      | -5       | 4.50           |
| 300                 | R | Middle temporal gyrus*     | 44       | -54      | 14       | 4.42           |
| 605                 | L | Amygdala*                  | -23      | -6       | -11      | 4.41           |
| 395                 | L | Middle frontal gyrus       | -23      | 54       | 21       | 4.37           |
|                     | L | Superior frontal gyrus     | -11      | 51       | 31       | 3.69           |
|                     | L | Middle frontal gyrus       | -32      | 47       | 25       | 3.65           |
| 537                 | L | Cingulate gyrus            | -12      | 25       | 31       | 4.33           |
|                     | L | Medial frontal gyrus       | -12      | 28       | 43       | 3.70           |
|                     | L | Superior frontal gyrus     | -11      | 39       | 45       | 3.34           |
| 373                 | R | Amygdala*                  | 26       | -3       | -12      | 4.30           |
| 339                 | L | Hippocampus                | -23      | -35      | -3       | 3.90           |
| 233                 | L | Middle temporal gyrus      | -48      | -3       | -15      | 3.87           |
|                     | L | Middle temporal gyrus      | -53      | -1       | -25      | 3.58           |
| 402                 | L | Brainstem red nucleus*     | -5       | -23      | -4       | 3.86           |
| 174                 | L | Superior temporal gyrus    | -55      | -39      | 7        | 3.81           |
| 241                 | L | Cingulate gyrus            | -8       | -39      | 32       | 3.73           |
|                     | L | Cingulate gyrus            | -14      | -53      | 25       | 3.54           |

The coordinates x, y, and z refers to the anatomical location, referring to standard stereotactic space as defined by Talairach and Tournoux. [43] L = left, R = right. Only clusters larger than 200 mm<sup>3</sup> are included. Cluster size, given as numbers of voxels, is the extent of the cluster of significant voxels. All peak voxels exceeds a voxelwise statistical uncorrected p < 0.001, with \* showing the anatomical location of voxels who survived correction for multiple comparisons p FWE < 0.05, after small volume correction.

**Table 5**

Anatomical location of areas of reduced grey matter in PDD compared with PDND (unmodulated images).

| Voxel level  |      |                          |     |     |     |         |
|--------------|------|--------------------------|-----|-----|-----|---------|
| Cluster size | Side | Anatomical location      | x   | y   | z   | T score |
| 1274         | R    | Superior temporal*       | 33  | 7   | -18 | 4.98    |
|              | R    | Amygdala*                | 27  | -1  | -13 | 4.03    |
|              | R    | Parahippocampal gyrus*   | 30  | -18 | -16 | 3.87    |
| 1209         | R    | Postcentral gyrus*       | 59  | -5  | 14  | 4.79    |
|              | R    | Precentral gyrus         | 50  | 8   | 8   | 4.03    |
| 961          | R    | Inferior frontal gyrus*  | 50  | 37  | 6   | 4.78    |
|              | R    | Middle frontal gyrus     | 33  | 42  | 23  | 4.19    |
|              | R    | Middle frontal gyrus     | 39  | 52  | 6   | 3.69    |
| 2039         | L    | Superior frontal gyrus*  | -12 | 53  | 31  | 4.73    |
|              | L    | Cingulate gyrus*         | -12 | 25  | 32  | 4.70    |
|              | L    | Middle frontal           | -23 | 53  | 21  | 4.21    |
| 1503         | L    | Middle frontal           | -39 | 46  | 14  | 4.57    |
|              | L    | Inferior frontal         | -47 | 24  | 7   | 4.08    |
|              | L    | Inferior frontal         | -49 | 31  | -6  | 3.94    |
| 2144         | R    | Superior temporal*       | 61  | -25 | 9   | 4.56    |
|              | R    | Middle temporal          | 55  | -9  | -6  | 4.14    |
|              | R    | Middle temporal          | 53  | -54 | 3   | 3.91    |
| 949          | R    | Anterior cingulate       | 3   | 5   | -8  | 3.31    |
| 319          | L    | Middle temporal          | -48 | -1  | -18 | 4.32    |
| 574          | L    | Middle temporal          | -53 | -37 | 4   | 4.18    |
| 304          | L    | Parahippocampal          | -27 | -35 | -11 | 3.99    |
| 136          | L    | Gyrus rectus             | -8  | 30  | -27 | 3.94    |
| 214          | R    | Thalamus, pulvinar*      | 15  | -26 | 10  | 3.91    |
| 407          | L    | Postcentral              | -61 | -14 | 17  | 3.76    |
|              | L    | Precentral               | -50 | -1  | 10  | 3.75    |
|              | L    | Precentral               | -53 | -8  | 13  | 3.67    |
| 70           | L    | Inferior temporal        | -48 | -58 | -1  | 3.74    |
| 60           | L    | Superior temporal        | -59 | -52 | 15  | 3.73    |
| 160          | R    | Inferior parietal lobule | 44  | -29 | 40  | 3.63    |
|              | R    | Postcentral gyrus        | 58  | -21 | 37  | 3.40    |
| 75           | L    | Medial frontal gyrus     | -12 | 49  | 0   | 3.62    |

The coordinates x, y, and z refers to the anatomical location, referring to standard stereotactic space as defined by Talairach and Tournoux. [43] L = left, R = right. Only clusters larger than 200 mm<sup>3</sup> are included. Cluster size, given as numbers of voxels, is the extent of the cluster of significant voxels. All peak voxels exceeds a voxelwise statistical uncorrected  $p < 0.001$ , with \* showing the anatomical location of voxels who survived correction for multiple comparisons  $p_{FWE} < 0.05$ , after small volume correction.
